# Supplementary material for: A Characterization and an Evolutionary and a Pathogenicity Analysis of Reassortment H3N2 Avian Influenza Virus in South China in 2019–2020
Source: MDPI journal article supplement (doi:10.3390/v14112574), 2022-11-21
Supplement: s1 [file s1]

Table S2a. Nucleotide and protein homology of HA gene of ten strains.

| Strain name | Sequence identities with some strains (nt/aa%) |             |              |              |             |              |             |             |             |
|-------------|------------------------------------------------|-------------|--------------|--------------|-------------|--------------|-------------|-------------|-------------|
|             | 34_2020                                        | 140_2020    | 144_2020     | 151_2020     | 157_2020    | 159_2020     | G152_2019   | G155_2019   | G188_2019   |
| 34_2020     | -                                              | 99.24/99.12 | 99.24/99.29  | 99.29/99.29  | 98.59/99.12 | 99.29/99.29  | 92.83/96.83 | 92.06/96.65 | 95.06/97.71 |
| 140_2020    | 99.24/99.12                                    | -           | 99.88/99.82  | 99.94/99.82  | 99.12/99.29 | 99.82/99.82  | 92.53/95.94 | 91.53/95.77 | 94.53/96.83 |
| 144_2020    | 99.24/99.29                                    | 99.88/99.82 | -            | 99.94/100.00 | 99.12/99.47 | 99.82/100.00 | 92.53/96.12 | 91.53/95.94 | 94.53/97.00 |
| 151_2020    | 99.29/99.29                                    | 99.94/99.82 | 99.94/100.00 | -            | 99.18/99.47 | 99.88/100.00 | 92.59/96.12 | 91.59/95.94 | 94.59/97.00 |
| 157_2020    | 98.59/99.12                                    | 99.12/99.29 | 99.12/99.47  | 99.18/99.47  | -           | 99.06/99.47  | 92.71/95.94 | 91.71/95.77 | 94.94/96.83 |
| 159_2020    | 99.29/99.29                                    | 99.82/99.82 | 99.82/100.00 | 99.88/100.00 | 99.06/99.47 | -            | 92.59/96.12 | 91.59/95.94 | 94.59/97.00 |
| G152_2019   | 92.83/96.83                                    | 92.53/95.94 | 92.53/96.12  | 92.59/96.12  | 92.71/95.94 | 92.59/96.12  | -           | 94.06/97.71 | 92.12/96.47 |
| G155_2019   | 92.06/96.65                                    | 91.53/95.77 | 91.53/95.94  | 91.59/95.94  | 91.71/95.77 | 91.59/95.94  | 94.06/97.71 | -           | 92.24/96.65 |
| G188_2019   | 95.06/97.71                                    | 94.53/96.83 | 94.53/97.00  | 94.59/97.00  | 94.94/96.83 | 94.59/97.00  | 92.12/96.47 | 92.24/96.65 | -           |
| G630_2019   | 95.65/98.94                                    | 95.24/98.06 | 95.36/98.24  | 95.30/98.24  | 95.06/98.06 | 95.30/98.24  | 91.36/96.65 | 91.48/96.47 | 94.12/98.06 |

Table S2b. Nucleotide and protein homology of NA gene of ten strains.

| Strain name | Sequence identities with some strains (nt/aa%) |               |             |              |               |             |             |             |             |
|-------------|------------------------------------------------|---------------|-------------|--------------|---------------|-------------|-------------|-------------|-------------|
|             | 159_2020                                       | 157_2020      | 151_2020    | 144_2020     | 140_2020      | 34_2020     | G152_2019   | G155_2019   | G188_2019   |
| 159_2020    | -                                              | 100.00/100.00 | 99.43/98.72 | 99.93/100.00 | 100.00/100.00 | 96.03/97.23 | 91.42/95.53 | 92.34/95.74 | 95.04/97.23 |
| 157_2020    | 100.00/100.00                                  | -             | 99.43/98.72 | 99.93/100.00 | 100.00/100.00 | 96.03/97.23 | 91.42/95.53 | 92.34/95.74 | 95.04/97.23 |
| 151_2020    | 99.43/98.72                                    | 99.43/98.72   | -           | 99.36/98.72  | 99.43/98.72   | 95.60/95.96 | 90.99/94.89 | 92.06/94.89 | 94.61/95.96 |
| 144_2020    | 99.93/100.00                                   | 99.93/100.00  | 99.36/98.72 | -            | 99.93/100.00  | 95.96/97.23 | 91.49/95.53 | 92.41/95.74 | 95.11/97.23 |
| 140_2020    | 100.00/100.00                                  | 100.00/100.00 | 99.43/98.72 | 99.93/100.00 | -             | 96.03/97.23 | 91.42/95.53 | 92.34/95.74 | 95.04/97.23 |
| 34_2020     | 96.03/97.23                                    | 96.03/97.23   | 95.60/95.96 | 95.96/97.23  | 96.03/97.23   | -           | 91.28/95.74 | 92.62/96.38 | 95.60/97.66 |
| G152_2019   | 91.42/95.53                                    | 91.42/95.53   | 90.99/94.89 | 91.49/95.53  | 91.42/95.53   | 91.28/95.74 | -           | 92.77/95.53 | 92.55/96.17 |
| G155_2019   | 92.34/95.74                                    | 92.34/95.74   | 92.06/94.89 | 92.41/95.74  | 92.34/95.74   | 92.62/96.38 | 92.77/95.53 | -           | 93.69/96.81 |
| G188_2019   | 95.04/97.23                                    | 95.04/97.23   | 94.61/95.96 | 95.11/97.23  | 95.04/97.23   | 95.60/97.66 | 92.55/96.17 | 93.69/96.81 | -           |
| G630_2019   | 93.83/97.23                                    | 93.83/97.23   | 93.55/96.38 | 93.90/97.23  | 93.83/97.23   | 94.40/97.45 | 91.35/96.17 | 91.99/96.38 | 95.96/97.45 |

Table S2c. Nucleotide and protein homology of PB2 gene of ten strains.

| Strain name | Sequence identities with some strains (nt/aa%) |             |             |             |             |             |             |             |             |
|-------------|------------------------------------------------|-------------|-------------|-------------|-------------|-------------|-------------|-------------|-------------|
|             | G152_2019                                      | G155_2019   | G188_2019   | G630_2019   | H159_2020   | 34_2020     | 140_2020    | 144_2020    | 151_2020    |
| G152_2019   | -                                              | 92.98/98.68 | 93.51/98.82 | 91.05/98.55 | 92.94/97.24 | 93.77/99.08 | 93.68/98.68 | 92.68/95.79 | 88.20/96.84 |
| G155_2019   | 92.98/98.68                                    | -           | 93.95/99.34 | 90.26/98.82 | 93.42/97.37 | 94.78/99.47 | 94.34/98.82 | 93.07/95.79 | 88.29/97.11 |
| G188_2019   | 93.51/98.82                                    | 93.95/99.34 | -           | 90.61/99.21 | 94.91/97.63 | 96.14/99.61 | 95.66/99.08 | 94.69/95.92 | 88.55/97.37 |
| G630_2019   | 91.05/98.55                                    | 90.26/98.82 | 90.61/99.21 | -           | 89.87/97.11 | 90.57/99.08 | 90.53/98.55 | 89.30/95.39 | 87.32/97.11 |
| H159_2020   | 92.94/97.24                                    | 93.42/97.37 | 94.91/97.63 | 89.87/97.11 | -           | 97.54/97.89 | 99.08/98.55 | 97.41/95.13 | 90.92/97.50 |
| 34_2020     | 93.77/99.08                                    | 94.78/99.47 | 96.14/99.61 | 90.57/99.08 | 97.54/97.89 | -           | 98.29/99.34 | 97.32/96.18 | 89.82/97.37 |
| 140_2020    | 93.68/98.68                                    | 94.34/98.82 | 95.66/99.08 | 90.53/98.55 | 99.08/98.55 | 98.29/99.34 | -           | 98.16/96.58 | 90.66/97.24 |
| 144_2020    | 92.68/95.79                                    | 93.07/95.79 | 94.69/95.92 | 89.30/95.39 | 97.41/95.13 | 97.32/96.18 | 98.16/96.58 | -           | 89.25/94.08 |
| 151_2020    | 88.20/96.84                                    | 88.29/97.11 | 88.55/97.37 | 87.32/97.11 | 90.92/97.50 | 89.82/97.37 | 90.66/97.24 | 89.25/94.08 | -           |
| 157_2020    | 90.22/97.89                                    | 90.61/98.16 | 90.88/98.42 | 88.29/98.16 | 92.32/97.11 | 92.41/98.42 | 92.98/98.55 | 92.41/96.71 | 92.76/96.84 |

Table S2d. Nucleotide and protein homology of PB1 gene of ten strains.

| Strain name | Sequence identities with some strains (nt/aa%) |             |             |              |             |              |             |             |             |
|-------------|------------------------------------------------|-------------|-------------|--------------|-------------|--------------|-------------|-------------|-------------|
|             | H159_2020                                      | 34_2020     | 140_2020    | 144_2020     | 151_2020    | 157_2020     | G155_2019   | G188_2019   | G630_2019   |
| H159_2020   | -                                              | 99.03/99.34 | 99.87/99.74 | 99.96/99.87  | 90.38/98.02 | 99.91/99.87  | 92.84/98.81 | 89.81/97.89 | 89.20/98.16 |
| 34_2020     | 99.03/99.34                                    | -           | 99.08/99.34 | 99.08/99.47  | 90.73/98.68 | 99.03/99.47  | 92.97/99.21 | 89.90/98.55 | 89.33/98.42 |
| 140_2020    | 99.87/99.74                                    | 99.08/99.34 | -           | 99.91/99.87  | 90.43/98.02 | 99.87/99.87  | 92.84/98.81 | 89.77/97.89 | 89.24/98.16 |
| 144_2020    | 99.96/99.87                                    | 99.08/99.47 | 99.91/99.87 | -            | 90.43/98.16 | 99.96/100.00 | 92.89/98.95 | 89.86/98.02 | 89.24/98.29 |
| 151_2020    | 90.38/98.02                                    | 90.73/98.68 | 90.43/98.02 | 90.43/98.16  | -           | 90.38/98.16  | 90.56/98.16 | 90.69/98.29 | 90.47/98.29 |
| 157_2020    | 99.91/99.87                                    | 99.03/99.47 | 99.87/99.87 | 99.96/100.00 | 90.38/98.16 | -            | 92.93/98.95 | 89.81/98.02 | 89.20/98.29 |
| G155_2019   | 92.84/98.81                                    | 92.97/99.21 | 92.84/98.81 | 92.89/98.95  | 90.56/98.16 | 92.93/98.95  | -           | 90.51/98.02 | 89.15/98.02 |
| G188_2019   | 89.81/97.89                                    | 89.90/98.55 | 89.77/97.89 | 89.86/98.02  | 90.69/98.29 | 89.81/98.02  | 90.51/98.02 | -           | 94.20/98.42 |
| G630_2019   | 89.20/98.16                                    | 89.33/98.42 | 89.24/98.16 | 89.24/98.29  | 90.47/98.29 | 89.20/98.29  | 89.15/98.02 | 94.20/98.42 | -           |
| G152_2019   | 97.01/98.55                                    | 97.01/99.21 | 96.97/98.55 | 97.06/98.68  | 90.34/98.55 | 97.10/98.68  | 93.15/98.68 | 89.81/98.16 | 88.93/98.16 |

Table S2e. Nucleotide and protein homology of PA gene of ten strains.

| Strain name | Sequence identities with some strains (nt/aa%) |             |             |             |              |             |             |              |              |
|-------------|------------------------------------------------|-------------|-------------|-------------|--------------|-------------|-------------|--------------|--------------|
|             | G152_2019                                      | G155_2019   | G188_2019   | G630_2019   | H159_2020    | 34_2020     | 140_2020    | 144_2020     | 151_2020     |
| G152_2019   | -                                              | 89.73/98.05 | 90.38/98.47 | 90.38/99.02 | 90.61/98.61  | 93.35/98.33 | 90.52/98.19 | 90.66/98.61  | 90.75/98.61  |
| G155_2019   | 89.73/98.05                                    | -           | 91.68/98.19 | 91.63/98.74 | 91.59/98.61  | 89.68/97.49 | 91.12/98.19 | 91.26/98.61  | 91.35/98.61  |
| G188_2019   | 90.38/98.47                                    | 91.68/98.19 | -           | 94.33/99.16 | 95.82/99.30  | 90.70/98.47 | 95.54/98.88 | 95.68/99.30  | 95.86/99.30  |
| G630_2019   | 90.38/99.02                                    | 91.63/98.74 | 94.33/99.16 | -           | 94.24/99.30  | 90.66/98.47 | 93.96/98.88 | 94.10/99.30  | 94.19/99.30  |
| H159_2020   | 90.61/98.61                                    | 91.59/98.61 | 95.82/99.30 | 94.24/99.30 | -            | 90.84/98.61 | 99.44/99.58 | 99.58/100.00 | 99.77/100.00 |
| 34_2020     | 93.35/98.33                                    | 89.68/97.49 | 90.70/98.47 | 90.66/98.47 | 90.84/98.61  | -           | 90.66/98.19 | 90.79/98.61  | 90.79/98.61  |
| 140_2020    | 90.52/98.19                                    | 91.12/98.19 | 95.54/98.88 | 93.96/98.88 | 99.44/99.58  | 90.66/98.19 | -           | 99.86/99.58  | 99.49/99.58  |
| 144_2020    | 90.66/98.61                                    | 91.26/98.61 | 95.68/99.30 | 94.10/99.30 | 99.58/100.00 | 90.79/98.61 | 99.86/99.58 | -            | 99.63/100.00 |
| 151_2020    | 90.75/98.61                                    | 91.35/98.61 | 95.86/99.30 | 94.19/99.30 | 99.77/100.00 | 90.79/98.61 | 99.49/99.58 | 99.63/100.00 | -            |
| 157_2020    | 98.37/99.44                                    | 89.82/97.77 | 90.10/98.19 | 90.19/98.74 | 90.61/98.61  | 93.40/98.33 | 90.52/98.19 | 90.66/98.61  | 90.75/98.61  |

Table S2f. Nucleotide and protein homology of NP gene of ten strains.

| Strain name | Sequence identities with some strains (nt/aa%) |             |             |             |               |             |             |               |              |
|-------------|------------------------------------------------|-------------|-------------|-------------|---------------|-------------|-------------|---------------|--------------|
|             | G152_2019                                      | G155_2019   | G188_2019   | G630_2019   | H159_2020     | 34_2020     | 140_2020    | 144_2020      | 151_2020     |
| G152_2019   | -                                              | 95.59/98.80 | 92.12/98.60 | 92.38/98.80 | 91.12/98.60   | 91.85/98.80 | 91.92/99.00 | 91.12/98.60   | 91.18/98.60  |
| G155_2019   | 95.59/98.80                                    | -           | 91.78/97.80 | 92.05/98.40 | 91.32/98.20   | 91.58/98.00 | 91.78/98.60 | 91.32/98.20   | 91.38/98.20  |
| G188_2019   | 92.12/98.60                                    | 91.78/97.80 | -           | 96.53/99.00 | 95.86/98.80   | 99.20/99.80 | 96.66/98.80 | 95.86/98.80   | 95.93/98.80  |
| G630_2019   | 92.38/98.80                                    | 92.05/98.40 | 96.53/99.00 | -           | 95.86/99.00   | 96.33/99.20 | 97.13/99.40 | 95.86/99.00   | 95.93/99.00  |
| H159_2020   | 91.12/98.60                                    | 91.32/98.20 | 95.86/98.80 | 95.86/99.00 | -             | 95.86/99.00 | 98.60/99.60 | 100.00/100.00 | 99.93/100.00 |
| 34_2020     | 91.85/98.80                                    | 91.58/98.00 | 99.20/99.80 | 96.33/99.20 | 95.86/99.00   | -           | 96.66/99.00 | 95.86/99.00   | 95.93/99.00  |
| 140_2020    | 91.92/99.00                                    | 91.78/98.60 | 96.66/98.80 | 97.13/99.40 | 98.60/99.60   | 96.66/99.00 | -           | 98.60/99.60   | 98.66/99.60  |
| 144_2020    | 91.12/98.60                                    | 91.32/98.20 | 95.86/98.80 | 95.86/99.00 | 100.00/100.00 | 95.86/99.00 | 98.60/99.60 | -             | 99.93/100.00 |
| 151_2020    | 91.18/98.60                                    | 91.38/98.20 | 95.93/98.80 | 95.93/99.00 | 99.93/100.00  | 95.93/99.00 | 98.66/99.60 | 99.93/100.00  | -            |
| 157_2020    | 91.05/98.40                                    | 91.38/98.00 | 96.06/99.00 | 95.93/99.20 | 99.67/99.80   | 95.93/99.20 | 98.53/99.40 | 99.67/99.80   | 99.73/99.80  |

Table S2g. Nucleotide and protein homology of NS gene of ten strains.

| Strain name | Sequence identities with some strains (nt/aa%) |             |             |             |             |             |               |               |             |
|-------------|------------------------------------------------|-------------|-------------|-------------|-------------|-------------|---------------|---------------|-------------|
|             | G152_2019                                      | G155_2019   | G188_2019   | G630_2019   | H159_2020   | 34_2020     | 140_2020      | 144_2020      | 151_2020    |
| G152_2019   | -                                              | 98.24/97.54 | 93.07/91.90 | 94.36/93.31 | 93.18/90.49 | 93.54/91.90 | 93.30/91.20   | 93.30/91.20   | 93.54/93.31 |
| G155_2019   | 98.24/97.54                                    | -           | 93.89/92.96 | 94.95/94.01 | 94.01/91.55 | 94.36/92.96 | 94.12/92.25   | 94.12/92.25   | 94.59/94.37 |
| G188_2019   | 93.07/91.90                                    | 93.89/92.96 | -           | 94.01/92.61 | 97.88/97.89 | 98.59/99.30 | 98.24/98.59   | 98.24/98.59   | 92.95/90.49 |
| G630_2019   | 94.36/93.31                                    | 94.95/94.01 | 94.01/92.61 | -           | 93.89/91.20 | 94.48/92.61 | 94.24/91.90   | 94.24/91.90   | 93.18/92.25 |
| H159_2020   | 93.18/90.49                                    | 94.01/91.55 | 97.88/97.89 | 93.89/91.20 | -           | 99.06/97.89 | 99.65/99.30   | 99.65/99.30   | 93.89/90.49 |
| 34_2020     | 93.54/91.90                                    | 94.36/92.96 | 98.59/99.30 | 94.48/92.61 | 99.06/97.89 | -           | 99.41/98.59   | 99.41/98.59   | 93.89/90.49 |
| 140_2020    | 93.30/91.20                                    | 94.12/92.25 | 98.24/98.59 | 94.24/91.90 | 99.65/99.30 | 99.41/98.59 | -             | 100.00/100.00 | 94.01/91.20 |
| 144_2020    | 93.30/91.20                                    | 94.12/92.25 | 98.24/98.59 | 94.24/91.90 | 99.65/99.30 | 99.41/98.59 | 100.00/100.00 | -             | 94.01/91.20 |
| 151_2020    | 93.54/93.31                                    | 94.59/94.37 | 92.95/90.49 | 93.18/92.25 | 93.89/90.49 | 93.89/90.49 | 94.01/91.20   | 94.01/91.20   | -           |
| 157_2020    | 94.24/95.07                                    | 95.30/96.13 | 93.54/92.25 | 95.42/95.42 | 93.30/90.85 | 94.01/92.25 | 93.65/91.55   | 93.65/91.55   | 97.06/96.48 |

Table S2h. Nucleotide and protein homology of M gene of ten strains.

| Strain name | Sequence identities with some strains (nt/aa%) |             |             |             |             |             |             |               |             |
|-------------|------------------------------------------------|-------------|-------------|-------------|-------------|-------------|-------------|---------------|-------------|
|             | G152_2019                                      | G155_2019   | G188_2019   | G630_2019   | 159_2020    | 34_2020     | 140_2020    | 144_2020      | 151_2020    |
| G152_2019   | -                                              | 95.11/97.87 | 96.33/98.78 | 95.42/97.26 | 96.44/99.09 | 95.42/98.78 | 96.44/99.09 | 96.54/99.39   | 96.13/97.87 |
| G155_2019   | 95.11/97.87                                    | -           | 96.64/97.87 | 97.45/98.17 | 96.74/98.17 | 96.33/98.48 | 96.74/98.17 | 96.84/98.48   | 96.23/96.95 |
| G188_2019   | 96.33/98.78                                    | 96.64/97.87 | -           | 97.15/97.26 | 98.88/99.09 | 97.25/98.78 | 98.88/99.09 | 98.98/99.39   | 98.37/97.87 |
| G630_2019   | 95.42/97.26                                    | 97.45/98.17 | 97.15/97.26 | -           | 97.05/97.56 | 96.64/97.26 | 97.05/97.56 | 97.15/97.87   | 96.54/96.34 |
| 159_2020    | 96.44/99.09                                    | 96.74/98.17 | 98.88/99.09 | 97.05/97.56 | -           | 96.95/99.09 | 99.80/99.39 | 99.90/99.70   | 99.49/98.78 |
| 34_2020     | 95.42/98.78                                    | 96.33/98.48 | 97.25/98.78 | 96.64/97.26 | 96.95/99.09 | -           | 96.95/99.09 | 97.05/99.39   | 96.44/97.87 |
| 140_2020    | 96.44/99.09                                    | 96.74/98.17 | 98.88/99.09 | 97.05/97.56 | 99.80/99.39 | 96.95/99.09 | -           | 99.90/99.70   | 99.29/98.17 |
| 144_2020    | 96.54/99.39                                    | 96.84/98.48 | 98.98/99.39 | 97.15/97.87 | 99.90/99.70 | 97.05/99.39 | 99.90/99.70 | -             | 99.39/98.48 |
| 151_2020    | 96.13/97.87                                    | 96.23/96.95 | 98.37/97.87 | 96.54/96.34 | 99.49/98.78 | 96.44/97.87 | 99.29/98.17 | 99.39/98.48   | -           |
| 157_2020    | 96.54/99.39                                    | 96.84/98.48 | 98.98/99.39 | 97.15/97.87 | 99.90/99.70 | 97.05/99.39 | 99.90/99.70 | 100.00/100.00 | 99.39/98.48 |
