# Supplementary material for: A Characterization and an Evolutionary and a Pathogenicity Analysis of Reassortment H3N2 Avian Influenza Virus in South China in 2019–2020
Source: MDPI journal article supplement (doi:10.3390/v14112574), 2022-11-21
Supplement: s1 [file s1]

Table S1. H3N2 strains isolated from 2019 to 2020.

| Name                                   | Date       | Host        | Location  | Isolate ID       |
|----------------------------------------|------------|-------------|-----------|------------------|
| A/Chicken/Guangdong/G152/2019/H3N2     | 2019-03-04 | Chicken     | Guangdong | EPI_ISL_13732930 |
| A/Chicken/Guangdong/G155/2019/H3N2     | 2019-03-04 | Chicken     | Guangdong | EPI_ISL_13732931 |
| A/Environment/Guangdong/G188/2019/H3N2 | 2019-03-06 | Environment | Guangdong | EPI_ISL_13732933 |
| A/Goose/Guangdong/G630/2019/H3N2       | 2019-08-21 | Goose       | Guangdong | EPI_ISL_13732934 |
| A/Duck/Guangdong/H34/2020/H3N2         | 2020-01-07 | Duck        | Guangdong | EPI_ISL_13732935 |
| A/Duck/Guangdong/H140/2020/H3N2        | 2020-06-04 | Duck        | Guangdong | EPI_ISL_13732936 |
| A/Duck/Guangdong/H144/2020/H3N2        | 2020-06-04 | Duck        | Guangdong | EPI_ISL_13732937 |
| A/Duck/Guangxi/H151/2020/H3N2          | 2020-06-09 | Duck        | Guangxi   | EPI_ISL_13734227 |
| A/Chicken/Sichuan/H157/2020/H3N2       | 2020-06-09 | Chicken     | Sichuan   | EPI_ISL_13734228 |
| A/Chicken/Guangdong/H159/2020/H3N2     | 2020-06-09 | Chicken     | Guangdong | EPI_ISL_13734229 |

All isolates except A/Environment/Guangdong/G188/2019/H3N2 were isolated from Non-vaccinated and asymptomatic avian.
