# Supplementary material for: A Characterization and an Evolutionary and a Pathogenicity Analysis of Reassortment H3N2 Avian Influenza Virus in South China in 2019–2020
Source: MDPI journal article supplement (doi:10.3390/v14112574), 2022-11-21
Supplement: s1 [file s1]

Table S5. The Most recent common ancestor of eight segments from all isolates.

| segment | R <sup>2</sup> | Best-fit model | strain    | Most recent common ancestor                      | Posterior |
|---------|----------------|----------------|-----------|--------------------------------------------------|-----------|
| PB2     | 0.6217         | GTR+F+G4       | H159_2020 | A_duck_China_322D22_2018_H3N2                    | 0.8888    |
|         |                |                | H144_2020 |                                                  |           |
|         |                |                | H140_2020 |                                                  |           |
|         |                |                | H34_2020  |                                                  |           |
|         |                |                | H157_2020 |                                                  |           |
|         |                |                | H151_2020 |                                                  |           |
|         |                |                | G155_2019 | A_duck_Zhejiang_6D4_2013_H3N2                    | 0.859     |
|         |                |                | G152_2019 |                                                  |           |
|         |                |                | G630_2019 | A_chicken_Yuhuan_YH14_2016_H1N2                  | 0.5352    |
| PB1     | 0.6244         | GTR+F+G4       | G188_2019 | A_chicken_Guangxi_165C7_2014_H3N2                | 0.7575    |
|         |                |                | H159_2020 | A_duck_Guangxi_293D21_2017_H1N2                  | 1         |
|         |                |                | H144_2020 |                                                  |           |
|         |                |                | H157_2020 |                                                  |           |
|         |                |                | H140_2020 |                                                  |           |
|         |                |                | H34_2020  |                                                  |           |
|         |                |                | G152_2019 |                                                  |           |
|         |                |                | G155_2019 | A_duck_Guangdong_04_22_DGCP064_P_2015_Mixed_H3N2 | 0.9479    |
|         |                |                | G188_2019 | A_duck_Hubei_ZYSYF2_2015_H3N6                    | 1         |
|         |                |                | G630_2019 | A_chicken_Zhejiang_51043_2015_H1N9               | 0.9956    |
|         |                |                | H151_2020 | A_duck_Mongolia_837_2015_H1N1                    | 1         |
| PA      | 0.6642         | GTR+F+G4       | H151_2020 | A_chicken_Ganzhou_GZ157_2016_H3N2                | 1         |
|         |                |                | H144_2020 |                                                  |           |
|         |                |                | H159_2020 |                                                  |           |
|         |                |                | H140_2020 |                                                  |           |
|         |                |                | G188_2019 | A_chicken_Ganzhou_GZ43_2016_H3N2                 | 0.9996    |
|         |                |                | G155_2019 | A_duck_Japan_AQ_HE103_2015_H1N2                  | 1         |
|         |                |                | G630_2019 | A_chicken_Zhejiang_51048_2015_H1N9               | 0.9999    |
|         |                |                | H34_2020  | A_duck_China_322D22_2018_H3N2                    | 1         |
|         |                |                | G152_2019 | A_common_teal_Shanghai_NH110923_2019_H1N1        | 1         |

|    |        |          |           |                                                |        |
|----|--------|----------|-----------|------------------------------------------------|--------|
|    |        |          | H157_2020 | A_duck_Bangladesh_19D668_2016_H2N3             | 0.9998 |
| HA | 0.5091 | GTR+F+G4 | G188      | A_duck_Hunan_7_2015_H3N6                       | 0.9911 |
|    |        |          | H34_2020  | A_duck_Hunan_161_2015_H3N6                     | 0.9357 |
|    |        |          | H157_2020 |                                                |        |
|    |        |          | H140_2020 |                                                |        |
|    |        |          | H159_2020 |                                                |        |
|    |        |          | H144_2020 |                                                |        |
|    |        |          | H151_2020 |                                                |        |
|    |        |          | G630_2019 |                                                |        |
|    |        |          | G155_2019 | A_duck_Guangdong_04_16_SZLG                    | 0.9996 |
|    |        |          | G152_2019 | WL012_2015_Mixed_H3N6                          |        |
| NP | 0.5195 | GTR+F+G4 | H144_2020 | A_duck_Hunan_7_2015_H3N6                       | 0.9644 |
|    |        |          | H159_2020 |                                                |        |
|    |        |          | H151_2020 |                                                |        |
|    |        |          | H140_2020 |                                                |        |
|    |        |          | H157_2020 |                                                |        |
|    |        |          | H34_2020  | A_duck_Guangxi_04_10_JX050_2015_Mixed_H3N2     | 0.6315 |
|    |        |          | G188_2019 |                                                |        |
|    |        |          | G630_2019 | A_duck_Jiangxi_22215_2013_H7N3                 | 0.997  |
|    |        |          | G152_2019 | A_duck_Zhejiang_422_2013_H4N6                  | 0.998  |
|    |        |          | G155_2019 | A_duck_Jiangxi_01_14_NCJD060_P_2015_Mixed_H3N6 | 0.4717 |
| NA | 0.5277 | GTR+F+G4 | H159_2020 | A_duck_Guangxi_293D21_2017_H1N2                | 1      |
|    |        |          | H157_2020 |                                                |        |
|    |        |          | H140_2020 |                                                |        |
|    |        |          | H144_2020 |                                                |        |
|    |        |          | H151_2020 |                                                |        |
|    |        |          | H34_2020  | A_duck_Guangdong_F352_2018_H3N2                | 1      |
|    |        |          | G188_2019 | A_duck_Jiangshu_YZ916_2016_H3N2                | 1      |
|    |        |          | G152_2019 | A_duck_Fujian_05_07_FZHD5_P_2015_Mixed_H6N2    | 0.9337 |
|    |        |          | G155_2019 |                                                |        |
|    |        |          | G630_2019 | A_duck_Guangdong_8_30_DGCP036_C_2017_H6N2      | 1      |
| MP | 0.43   | TN93+all | G188_2019 | A_duck_China_322D22_2018_H3N2                  | 0.9997 |
|    |        |          | H151_2020 |                                                |        |
|    |        |          | H140_2020 |                                                |        |
|    |        |          | H144_2020 |                                                |        |
|    |        |          | H157_2020 |                                                |        |
|    |        |          | H159_2020 |                                                |        |
|    |        |          | G630_2019 | A_chicken_Zhejiang_102622_2016_                | 0.9904 |

|    |       |           |           |                                                  |        |
|----|-------|-----------|-----------|--------------------------------------------------|--------|
|    |       | equal +G4 |           | 10_26_H10N8                                      |        |
|    |       |           | G155_2019 | A_duck_Guangdong_04_22_DGCP075_P_2015_Mixed_H3N2 | 0.9583 |
|    |       |           | H34_2020  | A_duck_Jiangshu_YZ916_2016_H3N2                  | 0.5736 |
|    |       |           | G152_2019 | A_mallard_Sanjiang_90_2006_H3N8                  | 0.9984 |
| NS | 0.563 | GTR+F+G4  | H157_2020 | A_common_teal_Shanghai_NH110923_2019_H1N1        | 0.962  |
|    |       |           | H151_2020 |                                                  |        |
|    |       |           | G630_2019 | A_chicken_Zhejiang_51043_2015_H1N9               | 0.9899 |
|    |       |           | H140_2020 | A_chicken_Ganzhou_GZ157_2016_H3N2                | 0.9952 |
|    |       |           | H159_2020 |                                                  |        |
|    |       |           | H144_2020 |                                                  |        |
|    |       |           | H34_2020  |                                                  |        |
|    |       |           | G188_2019 |                                                  |        |
|    |       |           | G152_2019 | A_chicken_Guangxi_165C7_2014_H3N2                | 0.6475 |
|    |       |           | G155_2019 |                                                  |        |
