# Supplementary material for: A Characterization and an Evolutionary and a Pathogenicity Analysis of Reassortment H3N2 Avian Influenza Virus in South China in 2019–2020
Source: MDPI journal article supplement (doi:10.3390/v14112574), 2022-11-21
Supplement: s1 [file s1]

Table S3. Similarity analysis of internal gene.

| Strain name | Gene | Closest virus                              | Homology (%) |
|-------------|------|--------------------------------------------|--------------|
| <b>H34</b>  | HA   | A/duck/Hunan/7/2015(H3N6)                  | 96.47        |
|             | NA   | A/duck/China/322D22/2018(H3N2)             | 98.02        |
|             | M    | A/duck/Vietnam/LBM48/2011(H3N2)            | 98.07        |
|             | NP   | A/chicken/Ganzhou/GZ157/2016(H3N2)         | 97.8         |
|             | NS   | A/chicken/Ganzhou/GZ43/2016(H3N2)          | 98.2         |
|             | PA   | A/duck/China/322D22/2018(H3N2)             | 98.03        |
|             | PB1  | A/duck/China/322D22/2018(H3N2)             | 97.95        |
|             | PB2  | A/duck/Guangxi/293D21/2017(H1N2)           | 98.85        |
| <b>H159</b> | HA   | A/duck/Hunan/7/2015(H3N6)                  | 96.36        |
|             | NA   | A/duck/Zhejiang/727042/2014(H6N2)          | 96.45        |
|             | M    | A/duck/China/322D22/2018(H3N2)             | 99.42        |
|             | NP   | A/duck/Guangdong/S4040/2011(H4N2)          | 100          |
|             | NS   | A/chicken/Ganzhou/GZ43/2016(H3N2)          | 97.53        |
|             | PA   | A/chicken/Ganzhou/GZ157/2016(H3N2)         | 97.81        |
|             | PB1  | A/duck/Guangxi/293D21/2017(H1N2)           | 97.74        |
|             | PB2  | A/duck/Guangxi/293D21/2017(H1N2)           | 97.78        |
| <b>G188</b> | HA   | A/duck/Hubei/ZYSYF18/2015(H3N6)            | 97.51        |
|             | NA   | A/chicken/Ganzhou/GZ43/2016(H3N2)          | 98.08        |
|             | M    | A/duck/China/322D22/2018(H3N2)             | 99.32        |
|             | NP   | A/chicken/Ganzhou/GZ157/2016(H3N2)         | 97.93        |
|             | NS   | A/chicken/Ganzhou/GZ43/2016(H3N2)          | 98.43        |
|             | PA   | A/chicken/Ganzhou/GZ43/2016(H3N2)          | 97.54        |
|             | PB1  | A/duck/Hubei/ZYSYF2/2015(H3N6)             | 98.3         |
|             | PB2  | A/chicken/Guangxi/165C7/2014(H3N2)         | 97.31        |
| <b>G630</b> | HA   | A/duck/Hubei/ZYSYF18/2015(H3N6)            | 95.53        |
|             | NA   | A/duck/Guangdong/8.30_DGCP036-C/2017(H6N2) | 98.09        |
|             | M    | A/chicken/Zhejiang/102622/2016(H10N8)      | 99.29        |
|             | NP   | A/duck/Jiangxi/22215/2013(H7N3)            | 99.4         |
|             | NS   | A/chicken/Zhejiang/51048/2015(H1N9)        | 98.47        |
|             | PA   | A/chicken/Yuhuan/YH14/2016(H1N2)           | 97.90        |

|      |     |                                                                  |       |
|------|-----|------------------------------------------------------------------|-------|
|      | PB1 | A/chicken/Zhejiang/51048/2015(H1N9)                              | 97.5  |
|      | PB2 | A/duck/Yuhuan/YH45/2016(H1N2)                                    | 97.86 |
| H144 | HA  | A/duck/Hunan/7/2015(H3N6)                                        | 96.41 |
|      | NA  | A/duck/Zhejiang/727042/2014(H6N2)                                | 96.52 |
|      | M   | A/duck/China/322D22/2018(H3N2)                                   | 99.51 |
|      | NP  | A/duck/Vietnam/HN5001/2018(H3N2)                                 | 97.38 |
|      | NS  | A/chicken/Ganzhou/GZ43/2016(H3N2)                                | 97.87 |
|      | PA  | A/chicken/Ganzhou/GZ157/2016(H3N2)                               | 97.68 |
|      | PB1 | A/duck/Guangxi/293D21/2017(H1N2)                                 | 97.78 |
|      | PB2 | A/duck/Guangxi/293D21/2017(H1N2)                                 | 97.65 |
| H140 | HA  | A/duck/Hunan/7/2015(H3N6)                                        | 96.41 |
|      | NA  | A/duck/Zhejiang/727042/2014(H6N2)                                | 96.45 |
|      | M   | A/duck/China/322D22/2018(H3N2)                                   | 99.42 |
|      | NP  | A/duck/Guangdong/S4040/2011(H4N2)                                | 98.80 |
|      | NS  | A/chicken/Ganzhou/GZ43/2016(H3N2)                                | 97.87 |
|      | PA  | A/chicken/Ganzhou/GZ157/2016(H3N2)                               | 97.54 |
|      | PB1 | A/duck/Guangxi/293D21/2017(H1N2)                                 | 97.78 |
|      | PB2 | A/duck/Guangxi/293D21/2017(H1N2)                                 | 98.50 |
| H151 | HA  | A/duck/Hunan/7/2015(H3N6)                                        | 96.47 |
|      | NA  | A/duck/Guangxi/293D21/2017(H1N2)                                 | 96.19 |
|      | M   | A/duck/China/322D22/2018(H3N2)                                   | 98.93 |
|      | NP  | A/duck/Guangdong/S4040/2011(H4N2)                                | 97.46 |
|      | NS  | A/environment/Bangladesh/42635/2020(H10N7)                       | 96.99 |
|      | PA  | A/chicken/Ganzhou/GZ157/2016(H3N2)                               | 97.95 |
|      | PB1 | A/Mallard (Anas platyrhynchos)/South Korea/KNU2019-33/2019(H7N7) | 99.12 |

|      |     |                                                                  |       |
|------|-----|------------------------------------------------------------------|-------|
|      | PB2 | A/chicken/Shandong/10.23_TAWL012-O/2018(H9N2)                    | 92.15 |
| H157 | HA  | A/duck/Hunan/7/2015(H3N6)                                        | 97.18 |
|      | NA  | A/duck/Zhejiang/727042/2014(H6N2)                                | 96.45 |
|      | M   | A/duck/China/322D22/2018(H3N2)                                   | 99.51 |
|      | NP  | A/duck/Guangdong/S4040/2011(H4N2)                                | 97.46 |
|      | NS  | A/environment/Bangladesh/42635/2020(H10N7)                       | 99.19 |
|      | PA  | A/Anas platyrhynchos/Belgium/11958/2018(H1N1)                    | 98.87 |
|      | PB1 | A/duck/Guangxi/293D21/2017(H1N2)                                 | 97.82 |
|      | PB2 | A/Mallard (Anas platyrhynchos)/South Korea/KNU2019-61/2019(H4N6) | 93.67 |
| G152 | HA  | A/chicken/Guangxi/165C7/2014(H3N2)                               | 95.88 |
|      | NA  | A/chicken/Guangxi/165C7/2014(H3N2)                               | 96.03 |
|      | M   | A/duck/Mongolia/619/2019(H3N6)                                   | 99.7  |
|      | NP  | A/duck/Zhejiang/422/2013(H4N6)                                   | 97.13 |
|      | NS  | A/mallard/Xuyi/14/2015(H3N8)                                     | 97.30 |
|      | PA  | A/duck/Bangladesh/38827/2019(H11N3)                              | 99.13 |
|      | PB1 | A/duck/Guangxi/293D21/2017(H1N2)                                 | 98.42 |
|      | PB2 | A/duck/Zhejiang/6D7/2013(H3N2)                                   | 94.74 |
| G155 | HA  | A/chicken/Guangxi/165C7/2014(H3N2)                               | 96.65 |
|      | NA  | A/duck/Guangdong/S1469/2010(H4N2)                                | 94.47 |
|      | M   | A/duck/Yuhuan/YH45/2016(H1N2)                                    | 98.15 |
|      | NP  | A/chicken/Guangxi/165C7/2014(H3N2)                               | 96.1  |
|      | NS  | A/mallard/Xuyi/14/2015(H3N8)                                     | 97.87 |
|      | PA  | A/duck/Japan/AQ-HE103/2015(H1N2)                                 | 95.84 |
|      | PB1 | A/duck/Japan/AQ-HE103/2015(H1N2)                                 | 96.12 |
|      | PB2 | A/chicken/Guangxi/165C7/2014(H3N2)                               | 95.31 |
