# Supplementary material for: A Characterization and an Evolutionary and a Pathogenicity Analysis of Reassortment H3N2 Avian Influenza Virus in South China in 2019–2020
Source: MDPI journal article supplement (doi:10.3390/v14112574), 2022-11-21
Supplement: s1 [file s1]

Table S4 The Substitution Rate of the eight segments.

| Gene | Substitution Rate and 95% HPD ( $10^{-3}$ subs/site/year) |        |        | ESS    |
|------|-----------------------------------------------------------|--------|--------|--------|
|      | Mean                                                      | Lower  | Upper  |        |
| PB2  | 4.9936                                                    | 4.0646 | 5.9315 | 1407.2 |
| PB1  | 2.7645                                                    | 2.266  | 3.2758 | 1490.3 |
| PA   | 2.724                                                     | 2.3898 | 3.0545 | 2357.4 |
| HA   | 3.447                                                     | 2.8667 | 4.0875 | 456.9  |
| NP   | 2.6903                                                    | 2.2769 | 3.1301 | 1483.2 |
| NA   | 4.2913                                                    | 3.7177 | 4.8743 | 1167.1 |
| MP   | 2.1103                                                    | 1.6106 | 2.6038 | 7347   |
| NS   | 2.5366                                                    | 1.8624 | 3.2288 | 1321.6 |
